# 1      **Comparison of target enrichment strategies for ancient** 2      **pathogen DNA**

3      Anja Furtwängler<sup>1,2\*</sup>, Judith Neukamm<sup>1,3,4</sup>, Lisa Böhme<sup>5</sup>, Ella Reiter<sup>1</sup>, Melanie Vollstedt<sup>5</sup>,  
4      Natasha Arora<sup>6</sup>, Pushpendra Singh<sup>7</sup>, Stewart T. Cole<sup>8</sup>, Sascha Knaut<sup>9,10</sup>, Sébastien Calvignac-  
5      Spencer<sup>11</sup>, Ben Krause-Kyora<sup>5,12</sup>, Johannes Krause<sup>1,2,12</sup>, Verena J. Schuenemann<sup>1,2,3#,\*</sup>,  
6      Alexander Herbig<sup>1,12#,\*</sup>

7

8      <sup>1</sup>Institute for Archaeological Sciences, Archaeo- and Palaeogenetics, University of  
9      Tübingen, Germany

10      <sup>2</sup>Senckenberg Centre for Human Evolution and Palaeoenvironment, University of Tübingen,  
11      Germany

12      <sup>3</sup>Institute of Evolutionary Medicine, University of Zurich, Switzerland.

13      <sup>4</sup>Institute for Bioinformatics and Medical Informatics, University of Tübingen, Germany

14      <sup>5</sup>Institute of Clinical Molecular Biology, Kiel University, Germany

15      <sup>6</sup>Zurich Institute of Forensic Medicine, University of Zurich, Switzerland

16      <sup>7</sup>Indian Council of Medical Research-National Institute of Research in Tribal Health,  
17      Jabalpur, MP, India

18      <sup>8</sup>Institute Pasteur, Paris, France

19      <sup>9</sup>Deutsches Primatenzentrum GmbH, Leibniz-Institute for Primate Research, Goettingen,  
20      Germany

21      <sup>10</sup>Department for Animal Sciences, Georg-August-University, Goettingen, Germany

22      <sup>11</sup>Robert Koch Institut, Berlin, Germany

23      <sup>12</sup>Max Planck Institute for the Science of Human History, Jena, Germany

24 #These authors jointly supervised this study.

25 \* Corresponding authors: [anja.furtwaengler@uni-tuebingen.de](mailto:anja.furtwaengler@uni-tuebingen.de), [verena.schuenemann@iem.uzh.ch](mailto:verena.schuenemann@iem.uzh.ch),  
26 [herbig@shh.mpg.de](mailto:herbig@shh.mpg.de)

27

## 28 **Abstract**

29 In ancient DNA research, the degraded nature of the samples generally results in poor yields  
30 of highly fragmented DNA, and targeted DNA enrichment is thus required to maximize  
31 research outcomes. The three commonly used methods – (1) array-based hybridization capture  
32 and in-solution capture using either (2) RNA or (3) DNA baits – have different characteristics  
33 that may influence the capture efficiency, specificity, and reproducibility. Here, we compared  
34 their performance in enriching pathogen DNA of *Mycobacterium leprae* and *Treponema*  
35 *pallidum* of 11 ancient and 19 modern samples. We find that in-solution approaches are the  
36 most effective method in ancient and modern samples of both pathogens, and RNA baits usually  
37 perform better than DNA baits.

## 38 **Method summary**

39 We compared three targeted DNA enrichment strategies used in ancient DNA research for  
40 the specific enrichment of pathogen DNA regarding their efficiency, specificity, and  
41 reproducibility for ancient and modern *Mycobacterium leprae* and *Treponema pallidum*  
42 samples. Array-based capture and in-solution capture with RNA and DNA baits were all tested  
43 in three independent replicates.

## 44 **Main Text**

45 The field of ancient DNA (aDNA), which studies DNA retrieved from paleontological and  
46 archaeological material, was revolutionized by the invention of high-throughput sequencing  
47 (HTS). In combination with HTS, the development of targeted DNA enrichment protocols has  
48 made a crucial contribution in advancing aDNA research during the last decade.

49 As DNA decays over time, aDNA is usually only present in trace amounts of highly  
50 fragmented sequences (1, 2, 3). Detecting endogenous pathogen aDNA from archaeological  
51 material is additionally compounded by the larger amount of background DNA from the  
52 environment including soil microorganisms. Furthermore, the background of host DNA in  
53 ancient remains is an additional obstacle in order to obtain ancient pathogen DNA. Shotgun  
54 sequencing of libraries from aDNA extracts to sufficient genomic coverage is, therefore, cost-  
55 intensive (4). To circumvent this problem, specific regions of interest such as bacterial  
56 chromosomes, mammalian mitochondrial genomes, or regions with single-nucleotide-  
57 polymorphisms (SNP) are often target-enriched before sequencing (4). Aside from its  
58 application in aDNA sequencing, targeted DNA enrichment is also useful to retrieve pathogen  
59 DNA from clinical samples, particularly for infectious agents that are found in low quantities  
60 in the host organism and which are difficult to culture, as is the case for *Mycobacterium leprae*  
61 and *Treponema pallidum*. Removal of background DNA prior to sequencing increases the yield  
62 of pathogen DNA, and thus allows valuable information for epidemiologists investigating  
63 outbreaks to be obtained.

64 For the enrichment of entire bacterial and mammalian chromosomes, there are currently  
65 three methods available, which are based on hybridization capture (5): DNA microarrays (here  
66 represented by SureSelect from Agilent Technologies), in-solution capture with DNA baits  
67 (represented by SureSelect from Agilent Technologies according to Fu and colleagues (6)) and  
68 in-solution capture with RNA baits (here represented by myBaits® from Arbor Biosciences).

69 In the case of the DNA array-based method, up to a million artificial DNA baits are printed  
70 on the surface of a glass slide (7). Additionally, there is the possibility to perform in-solution  
71 capture with baits cleaved from the glass slides and used right away or immortalized in DNA  
72 bait libraries (6). The second in-solution approach uses up to 100,000 artificial RNA baits. The

73 three approaches rely on the hybridization of target fragments to the complementary sequence  
74 of the baits (immobilized or in-solution), which can be levered to wash background DNA away.

75 To date there has been to our knowledge, no statistical comparison of the performance of all  
76 three methods: microarrays, in-solution capture with DNA baits, and in-solution capture with  
77 RNA baits (6). So far only microarrays and the in-solution capture with DNA baits were  
78 compared for *Salmonella enterica* and no replicates for statistical assessment were produced  
79 (8).

80 Here, we present results from the enrichment of modern and ancient samples containing  
81 pathogen DNA, using the three aforementioned approaches. All samples had previously tested  
82 positive but had also shown low amounts of target DNA for *M. leprae* or *T. pallidum*  
83 (Supplementary Table 1).

84 The different enrichment concepts tested were chosen to represent methods as they are  
85 applied in ongoing research and therefore not only differ in the technology used (DNA vs. RNA  
86 baits, immobilized vs. in-solution) but also in the design such as bait length and number of  
87 unique baits, which might have an effect on the performance.

88 We used eight ancient samples positive for *M. leprae* and six modern libraries from leprosy  
89 patients that were shown to contain *M. leprae* DNA (Supplementary Note 1). Genetic data from  
90 the ancient and modern *M. leprae* samples were previously published in 9 and 10. Samples with  
91 less than 0.6 % endogenous bacterial DNA were selected.

92 Modern *T. pallidum* samples (n=13) were previously published in 12 and 13. Three ancient  
93 extracts of *T. pallidum* were used from 14. The portion of endogenous DNA for the selected  
94 *T. pallidum* samples was below 0,01 % for ancient and modern samples.

95 Starting from existing sequencing libraries all three methods were applied with three  
96 independent replicates each (see Figure. 1 and Supplementary Note 1 for a detailed description  
97 of the methods, the newly generated data is available at the Sequence Read Archive under the

98 BioProject PRJNA645054). Following the manufacturer's suggestion for libraries with low  
99 yields of target DNA, we performed two successive rounds of hybridization for all methods. To  
100 investigate the effectiveness of this procedure, we compared results from the first and second  
101 rounds for the in-solution capture with RNA baits. We then evaluated differences in efficiency,  
102 reproducibility, and specificity across the three approaches by calculating mean coverage,  
103 standard deviation of the mean coverage, enrichment factor (calculated by dividing the % of  
104 target DNA after enrichment by the % of target DNA in the shotgun data), and the % of the  
105 genome covered 5-fold or more after normalizing the data of each bacterial species to the same  
106 number of raw reads (Supplementary Tables 2, 3 & 5 and Supplementary Figures 1 & 2).

107 For most ancient samples, the highest mean coverage (Figure 2A) is reached with the RNA  
108 bait in-solution capture (eight out of eleven, more details can be found in Supplementary Note  
109 2 & 3, and SSupplementary Tables 1 & 2). On average the RNA bait capture results in a 1.5  
110 and 20.0 times higher mean coverage than the DNA bait or the array capture, respectively. As  
111 illustrated in Figure. 2B, the highest enrichment factor is obtained in the RNA bait capture of  
112 ancient *T. pallidum* DNA (all three samples) and *M. leprae* (four samples showed best results  
113 for the RNA bait, three for the DNA bait, and one for the array), with values between 2-150x  
114 higher, compared to the other two approaches. An in-solution approach seems, therefore, to be  
115 advantageous for enriching ancient pathogen DNA.

116 A similar pattern can be observed in the data of the modern *M. leprae* and *T. pallidum*  
117 samples (Figures. 2A and 2B) further highlighting the performance of the in-solution approach  
118 in general and RNA baits in particular.

119 In-solution capture with DNA baits was used with robot-assistance in this study whereas the  
120 in-solution capture with RNA baits was performed in two different labs. Unsurprisingly, the  
121 DNA bait capture showed the smallest differences (2- to 50-fold lower) between the replicates

122 whereas the RNA bait capture showed the largest and the DNA array capture was intermediate.  
123 Consistent conditions are therefore crucial for reproducibility.

124 Another important feature of targeted enrichment is specificity. We estimated the specificity of  
125 the three tested methods by comparing the number of reads specific to either *M. leprae* or *T.*  
126 *pallidum* in comparison to general mycobacterial or treponemal reads, respectively (Figure 2  
127 C). Here, differences between the two pathogens can be observed. In the ancient and modern  
128 *T. pallidum* samples, the RNA bait capture consistently shows the highest proportion (up to 1.5  
129 times higher) of specific reads. The same trend was observed for the libraries prepared from  
130 recent leprosy patient samples, i.e. modern samples of *M. leprae*. Only for ancient *M. leprae*  
131 samples, the DNA bait capture is more specific. The highest percentages of specific reads are  
132 not necessarily found in samples with high percentages of endogenous DNA in the shotgun data  
133 before enrichment.

134 For ancient and modern samples, due to high efficiency, reproducibility and specificity in-  
135 solution approaches are highly recommendable.

136 Two rounds of hybridization are routinely performed in aDNA research, which is expected to  
137 improve enrichment but may also reduce data complexity in terms of portions of unique reads.  
138 To formally investigate the effect of the second round of capture, we also sequenced the  
139 libraries only enriched with one round of hybridization with the RNA baits and compared the  
140 results to the second round of hybridization. The second round of hybridization resulted in an  
141 increase in the enrichment factor for ancient and modern *M. leprae* samples (with an average  
142 of 2x increase) as well as for *T. pallidum* samples (with an average of 17x increase),  
143 demonstrating the utility of such a second round of hybridization capture (Supplementary Table  
144 5). On the other hand, when comparing the library complexity (Figure. 2 D and Supplementary  
145 Note 2 & 3, Supplementary Figure 3), we found a substantial loss of complexity after the second  
146 round of hybridization in all modern and ancient samples. This loss was reflected in the higher

147 percentage of unique reads in all the reads mapped after the first round. Therefore, if the portion  
148 of endogenous DNA in a sample is high in the beginning it may be worthwhile considering  
149 whether a single round of capture combined with deeper sequencing is sufficient or even  
150 advantageous.

151 The three protocols also differ in terms of cost and effort. The most cost-intensive is the array-  
152 capture approach (~673 € per sample), which requires additional equipment that is not usually  
153 necessary with the other approaches. The in-solution capture with DNA baits is, by contrast,  
154 cheaper once the baits are cleaved from the glass slide (~56,23€ per sample), but the version  
155 that can be used for the immortalization of the baits by transforming them into a library is not  
156 freely available. The in-solution capture with RNA baits is more comparable to the DNA bait  
157 capture than to the array with ~109 € per sample and it also needs the lowest number of  
158 additional equipment and reagents (Supplementary Table 7).

159 After a detailed comparison of the three tested methods it can be concluded that for ancient  
160 and modern pathogen samples, the RNA bait capture with two rounds of hybridization seems  
161 to be the most suitable. The generally high performance of the in-solution approach (mainly the  
162 one with RNA baits) for both bacterial species suggests that the findings are highly  
163 representative and comparable performance is also expected for a variety of other  
164 bacterial/microbial organisms.

## 165 **References (max. 20 References)**

- 166  
167  
168
1. Sawyer, Susanna; Krause, Johannes; Guschanski, Katerina; Savolainen, Vincent; Pääbo, Svante (2012): Temporal patterns of nucleotide misincorporations and DNA fragmentation in ancient DNA. In: *PLoS one* 7 (3), e34131. DOI: 10.1371/journal.pone.0034131.
  2. Allentoft, Morten E.; Collins, Matthew; Harker, David; Haile, James; Oskam, Charlotte L.; Hale, Marie L. et al. (2012): The half-life of DNA in bone: measuring decay kinetics in 158 dated fossils. In: *Proceedings. Biological sciences* 279 (1748), S. 4724–4733. DOI: 10.1098/rspb.2012.1745.
  3. Briggs, Adrian W.; Stenzel, Udo; Johnson, Philip L. F.; Green, Richard E.; Kelso, Janet; Prüfer, Kay et al. (2007): Patterns of damage in genomic DNA sequences from a Neandertal. In: *Proceedings of the National Academy of Sciences of the United States of America* 104 (37), S. 14616–14621. DOI: 10.1073/pnas.0704665104.
  4. Krause, Johannes (2010): From Genes to Genomes: What is New in Ancient DNA? In: *Mitteilungen der Gesellschaft für Urgeschichte* 19, S. 11–33.
- 172  
173  
174  
175  
176

- 177  
178  
179
- 180  
181  
182
- 183  
184  
185
- 186  
187  
188
- 189  
190  
191
- 192  
193  
194
- 195  
196  
197
- 198  
199  
200
- 201  
202  
203  
204
- 205
5. Spyrou, Maria A.; Bos, Kirsten I.; Herbig, Alexander; Krause, Johannes (2019): Ancient pathogen genomics as an emerging tool for infectious disease research. In: *Nature reviews. Genetics* 20 (6), S. 323–340. DOI: 10.1038/s41576-019-0119-1.
  6. Fu, Qiaomei; Meyer, Matthias; Gao, Xing; Stenzel, Udo; Burbano, Hernán A.; Kelso, Janet; Pääbo, Svante (2013): DNA analysis of an early modern human from Tianyuan Cave, China. In: *Proceedings of the National Academy of Sciences of the United States of America* 110 (6), S. 2223–2227. DOI: 10.1073/pnas.1221359110.
  7. Vågene, Åshild J.; Herbig, Alexander; Campana, Michael G.; Robles García, Nelly M.; Warinner, Christina; Sabin, Susanna et al. (2018): Salmonella enterica genomes from victims of a major sixteenth-century epidemic in Mexico. In: *Nature ecology & evolution* 2 (3), S. 520–528. DOI: 10.1038/s41559-017-0446-6.
  8. Burbano, Hernán A.; Hodges, Emily; Green, Richard E.; Briggs, Adrian W.; Krause, Johannes; Meyer, Matthias et al. (2010): Targeted investigation of the Neandertal genome by array-based sequence capture. In: *Science (New York, N.Y.)* 328 (5979), S. 723–725. DOI: 10.1126/science.1188046.
  9. Schuenemann, Verena J.; Singh, Pushpendra; Mendum, Thomas A.; Krause-Kyora, Ben; Jäger, Günter; Bos, Kirsten I. et al. (2013): Genome-wide comparison of medieval and modern *Mycobacterium leprae*. In: *Science (New York, N.Y.)* 341 (6142), S. 179–183. DOI: 10.1126/science.1238286.
  10. Schuenemann, Verena J.; Avanzi, Charlotte; Krause-Kyora, Ben; Seitz, Alexander; Herbig, Alexander; Inskip, Sarah et al. (2018): Ancient genomes reveal a high diversity of *Mycobacterium leprae* in medieval Europe. In: *PLoS pathogens* 14 (5), e1006997. DOI: 10.1371/journal.ppat.1006997.
  11. Knauf, Sascha; Gogarten, Jan F.; Schuenemann, Verena J.; Nys, Héléne M. de; Düx, Ariane; Strouhal, Michal et al. (2018): Nonhuman primates across sub-Saharan Africa are infected with the yaws bacterium *Treponema pallidum* subsp. pertenue. In: *Emerging microbes & infections* 7 (1), S. 157. DOI: 10.1038/s41426-018-0156-4.
  12. Arora, Natasha; Schuenemann, Verena J.; Jäger, Günter; Peltzer, Alexander; Seitz, Alexander; Herbig, Alexander et al.: Origin of modern syphilis and emergence of a pandemic *Treponema pallidum* cluster. In: *Nat Microbiol* 2 (1), S. 1–6. DOI: 10.1038/nmicrobiol.2016.245.
  13. Schuenemann, Verena J.; Kumar Lankapalli, Aditya; Barquera, Rodrigo; Nelson, Elizabeth A.; Iraíz Hernández, Diana; Acuña Alonzo, Víctor et al. (2018): Historic *Treponema pallidum* genomes from Colonial Mexico retrieved from archaeological remains. In: *PLoS neglected tropical diseases* 12 (6), e0006447. DOI: 10.1371/journal.pntd.0006447.

## 206 Author contributions

207 V.J.S., A.H. and J.K. conceived of the study. B.K. and S.C-S. provided RNA baits and  
208 sequencing libraries. N.A., P.S., S.T.C., S.K. provided sequencing libraries. A.F., L.B., E.R.,  
209 M.V. performed the laboratory work. A.F. and J.N. performed the data analysis. A.F. and A.H.  
210 conducted the statistical analysis. A.F. designed the figures. A.F., V.J.S, and A.H. wrote the  
211 manuscript with input from all authors. All authors reviewed the manuscript.

## 212 Acknowledgments

213 We thank all our colleagues providing samples for our study: Sarah Inskip (University of  
214 Cambridge, UK), Helen Donoghue (University College London, UK), Rodrigo Barquera (Max  
215 Planck Institute for the Science of Human History, Germany), Michael Taylor (University of  
216 Surrey, UK), Thomas Mendum (University of Surrey, UK), Graham Stewart (University of



217 Surrey, UK), Simon Roffey (The Magdalen Hill Archaeological Research Project (MHARP)  
218 Winchester, UK), Phil Marter (The Magdalen Hill Archaeological Research Project (MHARP)  
219 Winchester, UK), Katie Tucker (Deutsches Archäologisches Institut, Berlin, Germany), Fabian  
220 Leendertz (Robert Koch Institute, Berlin, Germany), Roman Wittig (Max Planck Institute for  
221 Evolutionary Anthropology, Leipzig, Germany), Anna Kjellström (University of Stockholm;  
222 Sweden), Christos Economou (University of Stockholm, Sweden), Petr Velemínský (National  
223 Museum, Czech Republic) Antónia Marcsik (University of Szeged, Hungary), Erika Molnár  
224 (University of Szeged, Hungary), György Pálfi (University of Szeged, Hungary), Valentina  
225 Mariotti (University of Bologna, Italy; Aix-Marseille Université, France), Alessandro Riga  
226 (University of Florence, Italy), M. Giovanna Belcastro (University of Bologna, Italy; Aix-  
227 Marseille Université, France), Jesper L. Boldsen (University of Southern Denmark, Denmark),  
228 and Charlotte Avanzi (Colorado State University, USA). The authors would also like to thank  
229 the laboratory team of the MPI for the Science of Human History in Jena for extensive support  
230 with capture experiments and sequencing and the developer of EAGER 2: Alexander Peltzer  
231 and James Fellows Yates (Max Planck Institute for the Science of Human History, Jena,  
232 Germany). This work was supported by the University of Zurich's University Research Priority  
233 Program "Evolution in Action: From Genomes to Ecosystems" (V.J.S), the Max-Planck Society  
234 (J.K., A.H.), the Senckenberg Centre for Human Evolution and Palaeoenvironment (S-HEP) at  
235 the University of Tübingen (V.J.S., J.K., A.F.). P.S.'s research work is supported by ICMR,  
236 DBT India, R2STOP Canada, and the Leprosy Research Initiative Netherlands. The manuscript  
237 has been approved by the Publication Screening Committee of ICMR-NIRTH, Jabalpur, and  
238 assigned with the number ICMR-NIRTH/PSC/44/2020.  
239

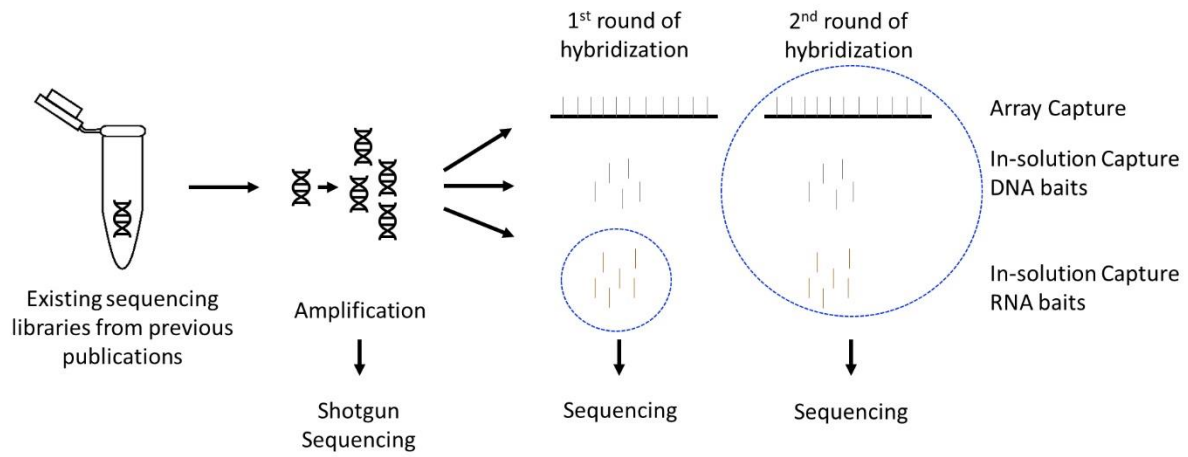

240

241 **Figure 1. Schematic representation of the workflow.** For all samples, the three different

242 enrichment protocols were tested in three independent replicates. Blue circles indicate the

243 libraries that were sequenced at each particular step.

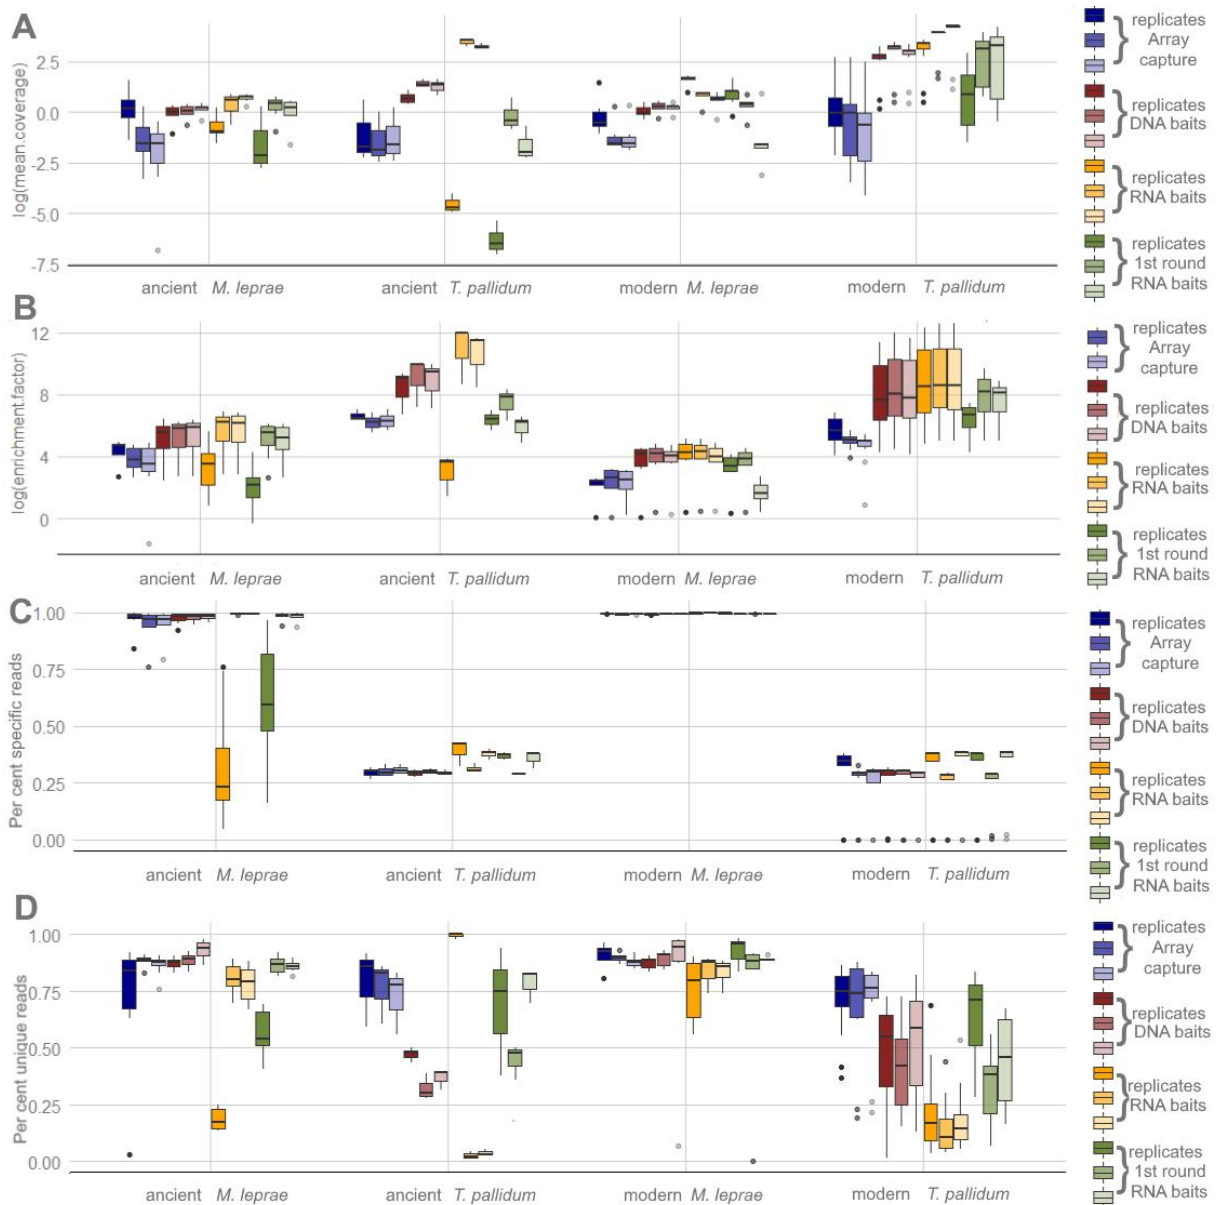

244

245 **Figure 2. Differences between the three tested protocols in ancient and modern *M.***

246 ***leprae* and *T. pallidum* samples.** A) Log-transformed values of the mean coverage. B) log-

247 transformed values of the enrichment factor calculated by dividing the percentage of

248 endogenous DNA by the percentage of endogenous DNA after shotgun sequencing. C) The

249 proportion of specific reads corresponding to *M. leprae* and *T. pallidum* compared to other

250 mycobacterial and treponemal reads, respectively. D) Percentage of unique reads calculated by

251 the number of unique reads divided by the total number of sequences mapped to represent

252 library complexity in *M. leprae* and *T. pallidum* samples.
